# Supplementary material
Source: MDPI journal article supplement (https://www.mdpi.com/2071-1050/11/3/563)
Supplement: s1 [file s1]

## Supplementary Materials

**Table S1.** Classes of bottom sediments quality for Strzyża Stream and Oliwski Stream with reference to LAWA classification [36].

| Retention Tank | Point | Classes of Bottom Sediments Quality for Strzyża Stream Depending on HM Concentrations |        |        |      |    |    |
|----------------|-------|---------------------------------------------------------------------------------------|--------|--------|------|----|----|
|                |       | Cu                                                                                    | Zn     | Pb     | Cd   | Cr | Ni |
| Strzyża Stream |       |                                                                                       |        |        |      |    |    |
| Nowiec         | IN    | I                                                                                     | I      | I      | I    | I  | I  |
|                | OUT   | I                                                                                     | I      | I      | I    | I  | I  |
| Ogrodowa       | IN    | I                                                                                     | I      | I      | I    | I  | I  |
|                | OUT   | I-II                                                                                  | II     | I-II   | I-II | I  | I  |
| Potokowa       | IN    | III                                                                                   | II-III | II-III | I    | I  | I  |
|                | OUT   | II-III                                                                                | II-III | I-II   | II   | I  | I  |
| Oliwski Stream |       |                                                                                       |        |        |      |    |    |
| Grunwaldzka    | IN    | I-II                                                                                  | II     | I-II   | I    | I  | I  |
|                | OUT   | II                                                                                    | II-III | II-III | II   | I  | I  |
| Chłopska       | IN    | II                                                                                    | I      | I      | I    | I  | I  |
|                | OUT   | II-III                                                                                | I-II   | I-II   | I    | I  | I  |
| Ogrodowa       | IN    | IV                                                                                    | I-II   | II-III | I    | I  | I  |
|                | OUT   | II                                                                                    | I      | I-II   | I    | I  | I  |

**Note:** Class I refers to uncontaminated sediment; class I-II: sediments unpolluted or with very small anthropogenic interference. Class II corresponds to moderately polluted sediments, and it is a reference for the other levels of pollution. Class II-III—twice the class II—defines moderate to significant contamination of sediments; class III—four times class II—defines significant pollution; class III-IV—eight times class II refers to a very strong pollution; class IV—means more than eight times exceeding class II—is an ultimate pollution. Comparative value is the average contents of HM expressed in mg/kg. **Bold**—cleanliness classes above moderate.

**Table S2.** Denotation of geochemical classification  $I_{geo}$  for bottom sediments [37–41].

| Class | $I_{geo}$ Value      | Description                               |
|-------|----------------------|-------------------------------------------|
| 0     | $I_{geo} \leq 0$     | uncontaminated sediments                  |
| 1     | $0 < I_{geo} \leq 1$ | uncontaminated to moderately contaminated |
| 2     | $1 < I_{geo} \leq 2$ | moderately contaminated                   |
| 3     | $2 < I_{geo} \leq 3$ | moderately to strongly contaminated       |
| 4     | $3 < I_{geo} \leq 4$ | strongly contaminated                     |
| 5     | $4 < I_{geo} \leq 5$ | strongly to extremely contaminated        |
| 6     | $I_{geo} > 5$        | extremely contaminated                    |

**Table S3.** Concentration of HMs in soils of analysed districts of Strzyża Stream and Oliwski Stream: GB [mg/kg d.w.] [43].

| Element | Concentrations in Strzyża Stream |      |      | Concentrations in Oliwski Stream |      |      |
|---------|----------------------------------|------|------|----------------------------------|------|------|
|         | Min                              | Max  | Mean | Min                              | Max  | Mean |
| Cu      | 3.30                             | 5.10 | 4.20 | 14.7                             | 19.1 | 16.9 |
| Zn      | 35.0                             | 55.0 | 45.0 | 108                              | 135  | 121  |
| Pb      | 12.4                             | 20.6 | 16.5 | 33.5                             | 44.5 | 39.0 |
| Cd      | 0.00                             | 0.50 | 0.25 | 0.75                             | 1.00 | 0.88 |
| Ni      | 4.10                             | 7.20 | 5.65 | 4.10                             | 7.20 | 5.65 |
| Cr      | 4.30                             | 5.10 | 4.70 | 6.90                             | 11.0 | 8.95 |

**Table S4.** Degrees of ecological risk ( $E_j^i$ ) (for single element) [23, 32, 34, 37, 38] and ecological risk (RI) for all factors HM contaminated sediments [32].

| Category                                       | Description of Risk |
|------------------------------------------------|---------------------|
| Ecological Risk for single element ( $E_j^i$ ) |                     |
| $E_j^i < 40$                                   | low risk            |
| $40 \leq E_j^i < 80$                           | moderate risk       |
| $80 \leq E_j^i < 160$                          | considerable risk   |
| $160 \leq E_j^i < 320$                         | high risk           |
| $E_j^i \geq 320$                               | very high risk      |
| Ecological risk for all factors (RI)           |                     |
| $RI < 95$                                      | low risk            |
| $95 \leq RI < 190$                             | moderate risk       |
| $190 \leq RI < 380$                            | considerable risk   |
| $RI \geq 380$                                  | very high risk      |
